# Supplementary material for: Generation of a Selective Small Molecule Inhibitor of the CBP/p300 Bromodomain for Leukemia Therapy
Source: Oxford University Press journal article supplement (doi:10.1158/0008-5472.can-15-0236), 2015-11-09
Supplement: 00085472can150236-sup-144383_1_supp_0_nfhfdv.docx [file 00085472can150236-sup-144383_1_supp_0_nfhfdv.docx]

**Supplemental Tables**

**Supplemental Table 1:** I-CBP112Tm data for bromodomains page: 2

**Supplemental Table 2:** I-CBP112ITC data page: 2

**Supplemental Table 3:** Selectivity screening data (outside BRD family) page: 3

**Supplemental Table 4:** ITC data (peptides) page: 7

### Supplemental Table 5: Data collection and refinement statistics page: 8

**Supplemental Table 6**: I-CBP112 deregulated genes (3d KASUMI-1) page: 9

**Supplemental Table 7**: I-CBP112 deregulated genes (3d MOLM-13) page: 18

**Supplemental Table 8**: I-CBP112 deregulated genes (3d SEM) page: 21

**Supplemental Table 1**: Temperature shift data of I-CBP112 against a panel of human bromodomains. The values represent the average of three independent measurements.

|  | Protein | ΔTm [ºC] | | |  | Protein | ΔTm [ºC] | | |
| --- | --- | --- | --- | --- | --- | --- | --- | --- | --- |
| 1 | ASH1L | 0.24 | ± | 0.26 | 23 | KIAA1240 | 0.05 | ± | 0.14 |
| 2 | ATAD2 | 0.14 | ± | 0.56 | 24 | LOC93349# | 0.65 | ± | 0.61 |
| 3 | BAZ1A | 0.16 | ± | 1.20 | 25 | PB1(1) | 0.77 | ± | 0.80 |
| 4 | BAZ2A | 0.17 | ± | 0.41 | 26 | PB1(2) | 0.13 | ± | 0.28 |
| 5 | BAZ2B | 0.12 | ± | 0.16 | 27 | PB1(3) | -0.24 | ± | 0.23 |
| 6 | BRD1 | 0.43 | ± | 0.35 | 28 | PB1(4) | 0.28 | ± | 0.62 |
| 7 | BRD2(1) | 1.35 | ± | 0.48 | 29 | PB1(5) | 0.11 | ± | 0.20 |
| 8 | BRD2(2) | 0.87 | ± | 0.28 | 30 | PB1(6) | -0.04 | ± | 0.28 |
| 9 | BRD3(1) | 1.55 | ± | 0.44 | 31 | PCAF | -0.01 | ± | 0.29 |
| 10 | BRD3(2) | 0.94 | ± | 0.25 | 32 | PHIP(2) | 0.62 | ± | 0.49 |
| 11 | BRD4(1) | 2.09 | ± | 0.41 | 33 | SMARCA2 | -0.02 | ± | 0.15 |
| 12 | BRD4(2) | 0.58 | ± | 0.20 | 34 | SMARCA4 | 0.36 | ± | 0.16 |
| 13 | BRDT(1) | 0.68 | ± | 0.43 | 35 | SP140 | -0.64 | ± | 0.86 |
| 14 | BRD9 | 0.20 | ± | 0.17 | 36 | TAF1(1) | 0.16 | ± | 0.17 |
| 15 | BRPF1 | 0.19 | ± | 0.60 | 37 | TAF1(2) | -0.13 | ± | 0.30 |
| 16 | BRPF3 | 0.07 | ± | 0.63 | 38 | TAF1L(1) | 0.12 | ± | 0.40 |
| 17 | BRWD3(2) | 0.64 | ± | 1.16 | 39 | TAF1L(2) | -0.04 | ± | 0.45 |
| 18 | CECR2 | 0.43 | ± | 0.19 | 40 | TIF1A# | 0.32 | ± | 0.31 |
| 19 | CREBBP | 7.77 | ± | 0.53 | 41 | TIF1A(PHD) | 0.26 | ± | 0.68 |
| 20 | EP300 | 8.69 | ± | 0.28 | 42 | TRIM28# | -0.42 | ± | 0.51 |
| 21 | FALZ | 0.63 | ± | 0.14 | 43 | TRIM66 | 0.15 | ± | 0.41 |
| 22 | GCN5L2 | 0.54 | ± | 0.27 | 44 | WDR9(2) | -0.33 | ± | 0.56 |

# PDH/BRD dual domain construct

**Supplemental Table 2:**

| **Protein** | **[P] (μM)** | **[L] (μM)** | **N** | **Kd**  **(nM)** | **Δ*Hobs* (cal/mol)** | **TΔS (kcal/mol)** | **ΔG (kcal/mol)** |
| --- | --- | --- | --- | --- | --- | --- | --- |
| CBP | 195 | 20 | 0.98 | 151 | -9031 ± 25.8 | -0.0380 | -8.99 |
| EP300 | 248 | 20 | 0.97 | 167 | -9291 ± 34.5 | -0.3456 | -8.94 |
| BRD4(1) | 450 | 17 | 1.01 | 5587 | -5363 ± 129.0 | 1.5638 | -6.92 |
| BRD4(2) | 440 | 17 | 0.96 | 20000 | -3704 ± 330.4 | 2.4912 | -6.19 |

Errors shown are errors of the non-linear least square fits. Measurements have been carried out at 15 ºC. [P] and [L] show the protein and ligand concentration used in the different experiments.

**Supplemental Table 2:** Isothermal Titration Calorimetry measurements of the interaction of I-CBP112 with bromodomains

**Supplemental Table 3A (CEREP selectivity data (enzymes))**

| **Enzyme assay** | **%[Inhibition]**  **at 10 M**  **(I-CBP112) (S)** | **%[ Inhibition]**  **at 10 M**  **(I-CBP112) (R)** |
| --- | --- | --- |
| COX1 | -33 | -4 |
| COX2 | 2 | 14 |
| inducible NOS | -35 | -37 |
| PDE2A1 | 4 | 2 |
| PDE3B | 0 | 0 |
| PDE4D2 | 14 | 15 |
| PDE5 (non-selective) | -2 | -1 |
| PDE6 (non-selective) | 8 | 6 |
| ACE | -7 | -21 |
| ACE-2 | 7 | 6 |
| BACE-1 (beta -secretase) | 4 | -1 |
| caspase-3 | -7 | -6 |
| HIV-1 protease | -3 | -1 |
| neutral endopeptidase (h) | 2 | 6 |
| MMP-1 | -11 | -17 |
| MMP-2 | 16 | 12 |
| MMP-9 | -15 | -2 |
| Abl kinase | 3 | 0 |
| CaMK2alpha | 0 | 0 |
| CDK2 (cycA) | -1 | 2 |
| ERK2 (P42mapk) | 7 | -1 |
| FLT-1 kinase (VEGFR1) | -3 | 5 |
| Fyn kinase | -4 | -3 |
| IRK (InsR) | 20 | -1 |
| Lyn A kinase | -1 | -7 |
| p38alpha kinase | -1 | -1 |
| ZAP70 kinase | -2 | 11 |
| acetylcholinesterase | 21 | 28 |
| COMT (catechol- O-methyl transferase) | -4 | 5 |
| xanthine oxidase/ superoxide O2- scavenging | 5 | -8 |
| ATPase (Na+/K+) | 0 | 0 |

**Supplemental Table 3 B (CEREP selectivity data (GPCRs and ion channels))**

| **GPCR Assay** | **%[I] at 10 M**  **(I-CBP112) (S)** | **%[I] at 10 M**  **(I-CBP112) (R)** |
| --- | --- | --- |
| A1 (ago. r.) | 4 | -5 |
| A2A (ago. r.) | 11 | 1 |
| A2B (anta. r.) | -4 | -13 |
| A3 (ago. r.) | -7 | -4 |
| alpha 1A (anta. r.) | 89 | 89 |
| alpha 1B (anta. r.) | 21 | 52 |
| alpha 2A (anta. r.) | 18 | 24 |
| alpha 2B (anta. r.) | -9 | 49 |
| alpha 2C (anta. r.) | 39 | 50 |
| beta 1 (ago. r.) | -4 | -9 |
| beta 2 (ago. r.) | 0 | 1 |
| beta 3 (anta. r.) | -3 | -15 |
| AT1 (anta. r.) | 21 | 9 |
| AT2 (ago. r.) | -8 | -1 |
| APJ (apelin) (ago. r.) | -3 | -1 |
| BZD (central) (ago. r.) | -5 | -12 |
| BB3 (ago. r.) | -10 | -22 |
| B2 (ago. r.) | -5 | -7 |
| CB1 (ago. r.) | -5 | 0 |
| CB2 (ago. r.) | 2 | 5 |
| CCK1 (CCKA) (ago. r.) | 6 | -6 |
| CCK2 (CCKB) (ago. r.) | -4 | -10 |
| CRF1 (ago. r.) | -19 | -26 |
| D1 (anta. r.) | 11 | 17 |
| D2S (ago. r.) | 12 | 28 |
| D3 (anta. r.) | -2 | 18 |
| ETA (ago. r.) | -2 | -27 |
| ETB (ago. r.) | -5 | -2 |
| GABAA1 (alpha 1,2,2) (ago. r.) | 12 | -6 |
| GABAB(1b) (anta. r.) | 0 | 4 |
| glucagon (ago. r.) | -8 | -16 |
| AMPA (ago. r.) | -14 | -14 |
| kainate ago. r.) | -7 | -2 |
| NMDA (anta. r.) | -16 | 0 |
| glycine (strychnine-insensitive)(anta. r.) | 0 | 3 |
| TNF-alpha (ago. r.) | -4 | 14 |
| CCR2 (ago. r.) | -10 | 0 |
| H1 (anta. r.) | 5 | -8 |
| H2 (anta. r.) | 3 | 7 |
| H3 (ago. r.) | 3 | -5 |
| H4 (ago. r.) | 2 | -3 |
| BLT1 (LTB4) (ago. r.) | 0 | -1 |
| CysLT1 (LTD4) (ago. r.) | -12 | -21 |
| MCH1 (ago. r.) | 7 | -9 |
| MC1(ago. r.) | 0 | 0 |
| MC3 (ago. r.) | -6 | -21 |
| MC4 (ago. r.) | -10 | 0 |
| MT1 (ML1A) (ago. r.) | -15 | -11 |
| MT3 (ML2) (ago. r.) | 45 | 54 |
| MAO-A (anta. r.) | -6 | -5 |
| motilin (ago. r.) | -1 | 2 |
| M1 (anta. r.) | 38 | 48 |
| M2 (anta. r.) | 67 | 49 |
| M3 (anta. r.) | 20 | 35 |
| M4 (anta. r.) | 74 | 63 |
| NK1 (ago. r.) | 4 | 8 |
| NK2 (ago. r.) | -8 | 2 |
| Y1 (ago. r.) | -10 | -10 |
| N neuronal alpha 4beta 2 (ago. r.) | 23 | 20 |
| N muscle-type (anta. r.) | 19 | 19 |
| delta 2 (DOP) (ago. r.) | 8 | -7 |
| kappa (KOP) (ago. r.) | -6 | -9 |
| mu (MOP) (ago. r.) | 3 | 5 |
| NOP (ORL1) (ago. r.) | 6 | 1 |
| PPARgamma (ago. r.) | -8 | -9 |
| PAF (ago. r.) | 9 | 11 |
| PCP (anta. r.) | -4 | 3 |
| EP2 (ago. r.) | 9 | 8 |
| FP (ago. r.) | -4 | -5 |
| IP (PGI2) (ago. r.) | -6 | -15 |
| LXRbeta (ago. r.) | 15 | 15 |
| 5-HT1A (ago. r.) | 16 | 58 |
| 5-HT1B (anta. r.) | 9 | 46 |
| 5-HT1D (ago. r.) | 18 | -1 |
| 5-HT2A (ago. r.) | 30 | 62 |
| 5-HT2B (ago. r.) | -17 | 7 |
| 5-HT2C (ago. r.) | 11 | 52 |
| 5-HT3 (anta. r.) | 3 | -11 |
| 5-HT4e (anta. r.) | 32 | 18 |
| 5-HT6 (ago. r.) | -6 | -3 |
| 5-HT7 (ago. r.) | 6 | 10 |
| sigma (non-selective) (ago. r.) | 46 | 15 |
| sst1 (ago. r.) | 15 | 16 |
| sst4 (ago. r.) | -7 | -7 |
| GR (ago. r.) | -5 | -1 |
| ERalpha (agonist fluoligand) | 5 | 2 |
| AR (ago. r.) | -3 | -24 |
| TR (TH) (ago. r.) | -26 | -29 |
| UT (ago. r.) | 8 | 21 |
| VPAC1 (VIP1) (ago. r.) | -2 | 1 |
| V1a (ago. r.) | 4 | -2 |
| V2 (ago. r.) | 4 | -6 |
| Ca2+ channel (L, dihydropyridine site) (anta. r.) | 4 | 7 |
| Ca2+ channel (L, diltiazem site) (benzothiazepines)(anta. r.) | 38 | 12 |
| Ca2+ channel (L, verapamil site) (phenylalkylamine) (anta. r.) | 19 | 23 |
| Ca2+ channel (N) (anta. r.) | 13 | -15 |
| SKCa channel (anta. r.) | 6 | 4 |
| Na+ channel (site 2) (anta. r.) | 11 | 8 |
| Cl- channel (GABA-gated) (anta. r.) | -48 | -15 |
| norepinephrine transporter (anta. r.) | 0 | -8 |
| dopamine transporter (anta. r.) | -3 | -9 |
| GABA transporter (anta. r.) | 0 | 3 |
| choline transporter (CHT1) (anta. r.) | 8 | 4 |
| 5-HT transporter (anta. r.) | -30 | -9 |

Assay data were provided by Cerep. Details on assay conditions and control compounds used can be found on the Cerep home page (<http://www.cerep.fr/Cerep/Users/index.asp>). Data are shown as [%] inhibition at 10 M compound concentration, (ago.r.) means (agonist radioligand) and (anta. r.) (antagonist radioligand), respectively.

**Supplemental Table 4**:

| **Protein** | **Peptide** | **KD**  **(μM)** | **Δ*H*obs**  **(kcal/mol)** | **N** | **TΔ*S***  **(kcal/mol)** | **Δ*G***  **(kcal/mol)** |
| --- | --- | --- | --- | --- | --- | --- |
| **CBP** | H3K56 | 13.8 ± 0.4 | -7.9 ± 0.1 | 0.966 | -1.6 | -6.30 |
| H4K5/K8 | 31.0 ± 0.5 | -13.7 ± 0.2 | 0.581 | -7.8 | -5.85 |
| H4K5/K8/K12 | 29.0 ± 0.7 | -14.8 ± 0.3 | 0.508 | -8.9 | -5.89 |
| **P300** | H4K5/K8/K12 | 28.7 ± 0.6 | -14.1 ± 0.2 | 0.602 | -8.2 | -5.90 |

Histone peptide sequences used in Isothermal Titration Calorimetry experiments.

| **Histone Marks** | **Peptide Sequence** |
| --- | --- |
| H3K56 | IRRYQ**Kac**STELL |
| H4K5/K8 | SGRG**Kac**GG**Kac**GLG**Y** |
| H4K5/K8/K12 | RG**Kac**GG**Kac**GLG**Kac**GG**Y** |

**Supplemental Table 4:** – Isothermal Titration Calorimetry of human CBP and p300 bromodomains with acetylated histone peptides. Titrations were carried out in 50 mM HEPES pH 7.5 (at 25 °C), 150 mM NaCl and 10 °C while stirring at 1000 rpm. Peptides were titrated into the protein solution.

### Supplemental Table 5 – Diffraction data collection and structure refinement statistics

| **Data Collection** |  |
| --- | --- |
| PDB ID | 4NR6 |
| Protein/Ligand | CBP/I-CBP112 |
| Space group | C2 |
| Cell dimensions: a, b, c (Å)  α, β, γ (deg) | 89.71 34.14 40.40  90.00 93.00 90.00 |
| Resolution* (Å) (last shell) | 1.66 (1.75-1.66) |
| Unique observations* | 14891 (2113) |
| Completeness* (%) | 99.0 (97.9) |
| Redundancy* | 3.4 (3.1) |
| Rmerge* | 0.063 (0.478) |
| I/ σI* | 10.7 (2.1) |
| **Refinement** |  |
| Resolution (Å) | 1.66 |
| Rwork / Rfree (%) | 18.1/23.1 |
| Number of atoms  (protein/other/water) | 971/108/34 |
| B-factors (Å2)  (protein/other/water)21.85 | 28.75/32.55/29.79 |
| r.m.s.d bonds (Å)  r.m.s.d angles (o) | 0.015  1.698 |
| Ramachadran Favoured (%)  Allowed (%)  Disallowed (%) | 100.00  0.00  0.00 |

* Values in parentheses correspond to the highest resolution shell.

**Supplemental Table 6**: Significantly regulated genes by exposure to I-CBP112 in KASUMI-1 cells after a 4 day exposure.

| **SYMBOL** | **ACCESSION** | **logFC** |
| --- | --- | --- |
| RNASE2 | NM_002934.2 | -1.877835933 |
| FCGR1B | NM_001017986.1 | -1.702248652 |
| TNFSF13B | NM_006573.3 | -1.67989315 |
| SLC2A5 | NM_003039.1 | -1.672716922 |
| ANKRD22 | NM_144590.2 | -1.627742908 |
| TNFSF13B | NM_006573.3 | -1.602234026 |
| TRH | NM_007117.1 | -1.427931544 |
| DHRS9 | NM_005771.3 | -1.417342182 |
| RN7SK | NR_001445.1 | 1.401097459 |
| FCGR1A | NM_000566.2 | -1.400344501 |
| ANKRD22 | NM_144590.1 | -1.36621096 |
| HIST1H2BD | NM_138720.1 | 1.329553007 |
| CTSG | NM_001911.2 | -1.30647185 |
| TP53INP1 | NM_033285.2 | 1.292337987 |
| TP53INP1 | NM_033285.2 | 1.284178791 |
| PDE4B | NM_002600.3 | -1.275221813 |
|  | BU521176 | 1.266766603 |
| SLC18A2 | NM_003054.2 | -1.226578349 |
| GAL | NM_015973.3 | -1.193818971 |
| P2RY13 | NM_023914.2 | -1.187211052 |
| LILRA2 | NM_006866.1 | -1.177311285 |
| CLEC5A | NM_013252.2 | -1.164826148 |
| TGM5 | NM_004245.2 | -1.150686072 |
| PRIC285 | NM_033405.2 | 1.147669149 |
| RNASE3 | NM_002935.2 | -1.13822367 |
| CA2 | NM_000067.1 | -1.116445878 |
| RNU1G2 | NR_004426.1 | 1.111258156 |
| IRF8 | NM_002163.2 | -1.108626173 |
| LOC100008588 | NR_003286.1 | 1.102030627 |
| CFC1B | NM_001079530.1 | -1.098726204 |
| FCGR1B | NM_001004340.1 | -1.079403736 |
| SLC22A4 | NM_003059.2 | -1.078694844 |
| IL8 | NM_000584.2 | -1.07207046 |
| LOC643332 | XR_016287.1 | -1.065588146 |
| TCTEX1D1 | NM_152665.1 | -1.063047603 |
| ARHGAP5 | NM_001173.2 | -1.057545115 |
| RNU1A3 | NR_004430.1 | 1.045536953 |
| LCP1 | NM_002298.2 | -1.039447122 |
| CLECL1 | NM_172004.2 | -1.033544741 |
| LOC100008589 | NR_003287.1 | 1.03060784 |
| TCEA3 | NM_003196.1 | -1.025015506 |
| SLC44A2 | NM_020428.2 | 1.023368002 |
| KIAA1666 | XM_942124.2 | 1.022623989 |
| RNU1-3 | NR_004408.1 | 1.02212079 |
| GATS | NM_178831.4 | 1.01158528 |
| RN7SK | NR_001445.1 | 1.010060857 |
| IGFBP7 | NM_001553.1 | -1.007405198 |
| ITM2A | NM_004867.3 | 1.003967171 |
| LMNA | NM_005572.3 | 0.996687984 |
| ABTB1 | NM_032548.2 | 0.986131497 |
| MXD4 | NM_006454.2 | 0.980475523 |
| RNU1-5 | NR_004400.1 | 0.977493995 |
| SERPINA1 | NM_001002236.1 | -0.976151167 |
| IL11RA | NM_004512.3 | 0.975740714 |
| VSIG4 | NM_007268.2 | -0.965293232 |
| DNAH10 | NM_001083900.1 | -0.956736082 |
| ID2 | NM_002166.4 | 0.945885703 |
| LOC730517 | XM_001126166.1 | -0.94501104 |
| ALOX5 | XM_001127464.1 | 0.927333724 |
| ID2 | NM_002166.4 | 0.926328665 |
| NPTX1 | NM_002522.2 | -0.9251063 |
| CUGBP2 | NM_001025076.2 | 0.923891112 |
| LOC100132394 | XM_001713809.1 | 0.92349068 |
| KLHL24 | NM_017644.3 | 0.923149838 |
| CCL5 | NM_002985.2 | -0.920773455 |
| NCRNA00085 | NR_024330.1 | 0.91845852 |
| FCGR1C | NM_001128589.1 | -0.916015504 |
| LPP | NM_005578.2 | 0.913557764 |
| TGM5 | NM_201631.2 | -0.911908708 |
| CCDC92 | NM_025140.1 | 0.911353818 |
| SIGLEC12 | NM_053003.2 | -0.910665443 |
| PLAC8 | NM_016619.1 | -0.909829172 |
| ADCY6 | NM_020983.2 | 0.909384648 |
| P2RY13 | NM_176894.1 | -0.909315511 |
| PLAC8 | NM_016619.1 | -0.908090985 |
| LOC100133565 | XM_001724542.1 | 0.905216492 |
| KIF1A | NM_004321.4 | -0.900979672 |
| LOC100132564 | XM_001713808.1 | 0.893565916 |
| PTRF | NM_012232.3 | 0.892204925 |
| SERPINA1 | NM_001002235.1 | -0.888617683 |
| YPEL5 | NM_016061.1 | 0.886604293 |
| MLKL | XM_001126647.1 | -0.885082105 |
| LOC727877 | XM_001126181.1 | 0.883305271 |
| CCL5 | NM_002985.2 | -0.879878746 |
| PRSSL1 | NM_214710.2 | -0.875868217 |
| RNU4-2 | NR_003137.2 | 0.874835085 |
| SMPDL3B | NM_014474.2 | -0.872676098 |
| TM7SF2 | NM_003273.2 | 0.86554732 |
| KIAA1370 | NM_019600.2 | 0.862331804 |
| NINJ2 | NM_016533.4 | -0.855603147 |
| TMEM71 | NM_144649.1 | 0.855409203 |
| RGL4 | NM_153615.1 | -0.854372522 |
| TESK2 | NM_007170.2 | 0.853568261 |
| RASSF2 | NM_170773.1 | 0.8534815 |
| NCOA3 | NM_181659.1 | 0.849884433 |
| LOC100008589 | NR_003287.1 | 0.848939478 |
| INSIG1 | NM_198336.1 | -0.848246145 |
| DLK1 | NM_003836.4 | -0.846431063 |
| HIST1H2AC | NM_003512.3 | 0.843040423 |
| CA2 | NM_000067.1 | -0.841206782 |
| SECISBP2L | NM_014701.2 | 0.837905551 |
|  | CA841942 | 0.834963108 |
| RPS6KA2 | NM_001006932.1 | 0.833074165 |
| LGALS12 | NM_033101.2 | -0.831446232 |
| SRGN | NM_002727.2 | -0.830685962 |
| RNU6-1 | NR_004394.1 | 0.829563839 |
| STMN3 | NM_015894.2 | 0.829339729 |
| C1orf63 | NM_020317.3 | 0.828028355 |
| FTHL12 | NR_002205.1 | 0.825968874 |
| CCNG2 | NM_004354.1 | 0.824977259 |
| CYTH2 | NM_017457.4 | 0.824749723 |
| SMPDL3B | NM_014474.2 | -0.823444679 |
| SAT2 | NM_133491.2 | 0.822114216 |
| ZFP36L1 | NM_004926.2 | 0.820692762 |
| LOC441763 | XM_930284.1 | 0.819514952 |
| KRCC1 | NM_016618.1 | 0.818167224 |
| CHST4 | NM_005769.1 | -0.81320542 |
| ABCB1 | NM_000927.3 | 0.812903278 |
| STOM | NM_004099.4 | -0.811988893 |
| SH3GLB2 | NM_020145.2 | 0.81025036 |
| OCIAD2 | NM_001014446.1 | 0.809796052 |
| MT2A | NM_005953.2 | -0.808054071 |
| FTHL16 | XR_041433.1 | 0.805749392 |
| NCOA7 | NM_181782.2 | -0.805381486 |
| ALOX5AP | NM_001629.2 | -0.80425683 |
| ITM2C | NM_001012516.1 | 0.800105429 |
| LBR | NM_002296.2 | -0.798207513 |
| FTHL8 | NR_002203.1 | 0.794555377 |
| RNU6-15 | NR_028372.1 | 0.794393014 |
| DHRS9 | NM_005771.3 | -0.793265337 |
| NCF2 | NM_000433.2 | -0.791115019 |
| ITM2C | NM_001012516.1 | 0.790243251 |
| VSTM1 | NM_198481.3 | -0.788502886 |
| NFE2 | NM_006163.1 | -0.78583396 |
| KIAA1370 | NM_019600.1 | 0.783799882 |
| CD247 | NM_000734.2 | -0.783573864 |
| DRAM1 | NM_018370.2 | -0.780332899 |
| TRPT1 | NM_031472.2 | 0.780034716 |
| LAMA5 | NM_005560.3 | 0.77978001 |
| SLC22A4 | NM_003059.2 | -0.778123798 |
|  | U62823 | 0.777208339 |
| CEACAM6 | NM_002483.3 | -0.776121412 |
| LAX1 | NM_017773.2 | -0.77448784 |
| CAPN5 | NM_004055.4 | 0.77336783 |
| GAPT | NM_152687.2 | -0.772746224 |
|  | AK092638 | 0.772226064 |
| EMR2 | NM_152916.1 | 0.770953593 |
| CCM2 | NM_001029835.1 | 0.76700636 |
| LOC338758 | XM_931359.2 | 0.766703959 |
| LOC100134364 | XM_001713810.1 | 0.766591561 |
| BMF | NM_033503.3 | 0.764226844 |
|  | BC035116 | 0.762094469 |
| TP53I3 | NM_147184.1 | 0.760896032 |
| SLC22A18 | NM_002555.3 | 0.76042985 |
| CSF3R | NM_172313.1 | -0.759201113 |
| SESN1 | NM_014454.1 | 0.756629772 |
| ITGA3 | NM_002204.1 | 0.755436013 |
| FTHL11 | NR_002204.1 | 0.755052893 |
| ST3GAL6 | NM_006100.2 | -0.753690727 |
| RET | NM_020975.4 | -0.752906428 |
| GPR84 | NM_020370.1 | -0.752814282 |
| KIAA0913 | NM_015037.2 | 0.750458835 |
| EAF2 | NM_018456.4 | -0.74608937 |
| AGTRAP | NM_001040196.1 | -0.745490903 |
| PIK3IP1 | NM_052880.3 | 0.744644082 |
| HBP1 | NM_012257.3 | 0.744163883 |
| FAM116B | NM_001001794.2 | 0.740225594 |
| KIAA1683 | NM_025249.1 | 0.738507873 |
| ID3 | NM_002167.2 | 0.737841726 |
| ECHDC2 | NM_018281.2 | 0.73715926 |
| POLR3G | NM_006467.2 | -0.735486629 |
| LOC730517 | XM_001715215.1 | -0.732031558 |
| HLA-DMA | NM_006120.2 | 0.731783475 |
| SHISA2 | NM_001007538.1 | -0.731193571 |
| CCM2 | NM_001029835.1 | 0.730566218 |
| IRF7 | NM_004029.2 | 0.73052072 |
| MERTK | NM_006343.2 | 0.730178672 |
| CCNG1 | NM_199246.1 | 0.730060899 |
|  | AK055652 | 0.7274365 |
| AIF1 | NM_032955.1 | -0.726402363 |
| NDRG1 | NM_006096.2 | 0.724979086 |
| C1orf63 | NM_207035.1 | 0.724226792 |
| S100P | NM_005980.2 | -0.721819575 |
| CUGBP2 | NM_006561.2 | 0.720962508 |
| SSBP2 | NM_012446.2 | 0.7209271 |
| RGL1 | NM_015149.3 | 0.720319412 |
|  | AF131784 | 0.717526357 |
| NMI | NM_004688.1 | -0.716831381 |
| CTSB | NM_001908.3 | 0.716777886 |
| ECE2 | NM_014693.2 | -0.715872055 |
| BTG1 | NM_001731.1 | 0.715026787 |
| CD247 | NM_198053.1 | -0.712791412 |
| LMNA | NM_005572.3 | 0.712283107 |
| RNU1F1 | NR_004402.1 | 0.709590265 |
| LOC100133999 | XM_001716785.1 | 0.709133489 |
| AMT | NM_000481.2 | 0.708810348 |
| FTHL7 | NR_002202.2 | 0.705767355 |
| XPOT | NM_007235.3 | -0.705013519 |
| IL1RAP | NM_002182.2 | -0.704628555 |
| IL1RAP | NM_134470.2 | -0.703317255 |
| MGST1 | NM_020300.3 | -0.701071913 |
| RPS7 | NM_001011.3 | -0.698490687 |
| RNU6ATAC | NR_023344.1 | 0.697287569 |
| GSN | NM_198252.2 | -0.695932003 |
| PCBP4 | NM_020418.2 | 0.694727061 |
| KLF12 | NM_007249.4 | 0.694174037 |
| CDR2L | NM_014603.1 | 0.691743337 |
| TIPIN | NM_017858.1 | -0.691653487 |
| CFD | NM_001928.2 | 0.690555215 |
| RFC2 | NM_181471.1 | -0.689877528 |
| FTHL12 | NR_002205.1 | 0.689573183 |
| MOAP1 | NM_022151.4 | 0.686746952 |
| KIFC2 | NM_145754.2 | 0.685649227 |
| FAM89A | NM_198552.1 | 0.685606807 |
| XYLT1 | NM_022166.3 | 0.685480593 |
| RET | NM_020630.4 | -0.684257621 |
| FTHL2 | NR_002200.1 | 0.682539387 |
| C5orf41 | NM_153607.1 | 0.682279717 |
| LOC729843 | XR_016056.1 | 0.682173146 |
| TMEM48 | NM_018087.3 | -0.681631469 |
| KIAA0355 | NM_014686.3 | 0.680904277 |
| POLR3G | NM_006467.2 | -0.680346596 |
| FAM176B | NM_018166.1 | 0.680203808 |
| GOLGA8B | NM_001023567.2 | 0.679706172 |
| SPSB3 | NM_080861.3 | 0.6772486 |
| PDE4B | NM_002600.3 | -0.676925141 |
| ATP9A | NM_006045.1 | -0.676837733 |
| SYNGR1 | NM_004711.3 | -0.676686047 |
| OSTalpha | NM_152672.4 | -0.675509103 |
| KIAA1602 | NM_020941.1 | 0.675010441 |
| DDAH2 | NM_013974.1 | 0.674953842 |
| TNFAIP8 | NM_001077654.1 | -0.674662204 |
| IGLL1 | NM_020070.2 | -0.674187524 |
| LOC100128291 | XR_039099.1 | -0.673925454 |
| PSCD1 | NM_017456.1 | 0.672916405 |
| BCL6 | NM_001706.2 | 0.670887872 |
| FTHL11 | NR_002204.1 | 0.670263229 |
| TRIM8 | NM_030912.2 | 0.669794276 |
| HSPD1 | NM_002156.4 | -0.669694607 |
| TRIP13 | NM_004237.2 | -0.66856334 |
| SLC7A5 | NM_003486.5 | -0.666822405 |
| ECM1 | NM_022664.1 | -0.666818915 |
| CEBPE | NM_001805.2 | -0.665448617 |
| LOC730167 | XM_001726158.1 | -0.664750249 |
| MT1G | NM_005950.1 | -0.664688101 |
| P2RX1 | NM_002558.2 | 0.663092985 |
| BNIP3L | NM_004331.2 | 0.66282058 |
| HIST1H2BD | NM_138720.1 | 0.661919954 |
| AKNA | NM_030767.3 | 0.659628157 |
| CDO1 | NM_001801.2 | 0.656206461 |
| PRKDC | NM_006904.6 | -0.65620356 |
| CDKN2C | NM_078626.2 | 0.655944952 |
| RRAS | NM_006270.3 | 0.655916007 |
| CYTH1 | NM_017456.2 | 0.655539202 |
|  | BX097705 | -0.655389778 |
| MRPL35 | NM_145644.1 | -0.653997665 |
| TXNIP | NM_006472.2 | 0.653424334 |
| GHDC | NM_032484.3 | 0.653006313 |
| CORO1B | NM_001018070.1 | 0.652516334 |
| PPP1R15A | NM_014330.2 | 0.652091186 |
| CTSB | NM_147780.2 | 0.651905251 |
| UBE1 | NM_153280.1 | -0.651303867 |
| NTSR1 | NM_002531.2 | -0.65071254 |
| MLKL | NM_152649.1 | -0.650248547 |
| RANBP1 | NM_002882.2 | -0.649999647 |
| STX5 | NM_003164.3 | 0.649182523 |
| LYAR | NM_017816.1 | -0.648106132 |
| CCND3 | NM_001760.2 | 0.647916175 |
| CCDC58 | NM_001017928.2 | -0.64726471 |
| TTLL3 | NM_015644.3 | 0.644822356 |
| SNORD3D | NR_006882.1 | 0.644508922 |
| MFSD6 | NM_017694.3 | 0.642543707 |
| LOC100134144 | XM_001717999.1 | 0.642472057 |
| GAPT | NM_152687.2 | -0.641792835 |
| LMO2 | NM_005574.2 | -0.641576633 |
| ADCY6 | NM_020983.2 | 0.641492433 |
| C9orf103 | NM_001001551.1 | 0.639404177 |
| RN5S9 | NR_023371.1 | 0.638596481 |
| HOMER2 | NM_199332.2 | -0.638269318 |
| SLC25A19 | NM_021734.3 | -0.6381119 |
| ECM1 | NM_004425.2 | -0.638015907 |
| DNAJB2 | NM_006736.5 | 0.63765721 |
| AXUD1 | NM_033027.2 | 0.636833989 |
| DBN1 | NM_004395.2 | 0.636620656 |
| TNFRSF6B | NM_032945.2 | 0.636470315 |
| LOC643870 | XM_927140.1 | 0.63623206 |
| SRGN | NM_002727.2 | -0.635497918 |
| LTA4H | NM_000895.1 | 0.635176309 |
| LAIR2 | NM_021270.2 | -0.634719989 |
| BIK | NM_001197.3 | -0.63449453 |
| RASGRP2 | NM_005825.2 | -0.633425058 |
| SYT11 | NM_152280.2 | 0.633056298 |
| FAM43A | NM_153690.4 | 0.632231485 |
| CTDSP2 | NM_005730.3 | 0.631752015 |
| ZNF581 | NM_016535.3 | 0.631005189 |
| CACNB3 | NM_000725.2 | 0.629865677 |
| P2RY5 | NM_005767.4 | 0.629641289 |
|  | BX641108 | 0.628565042 |
| LRRC17 | NM_005824.1 | -0.628457473 |
| LOC85390 | NR_001454.1 | -0.628300935 |
| CD68 | NM_001251.1 | -0.627528383 |
| ZNF211 | NM_006385.2 | 0.627481848 |
| S100A4 | NM_019554.2 | 0.627175686 |
| PPM1G | NM_177983.1 | -0.62456829 |
| SC4MOL | NM_006745.3 | -0.624455616 |
| MS4A7 | NM_206938.1 | -0.623637243 |
| PTGER2 | NM_000956.2 | -0.622068997 |
| TUG1 | NR_002323.1 | 0.621592305 |
| TSPAN9 | NM_006675.3 | 0.620161447 |
| C2orf65 | NM_138804.3 | -0.619464591 |
| ICAM3 | NM_002162.2 | 0.61939787 |
| PTMS | NM_002824.4 | 0.619301501 |
| ZMIZ1 | NM_020338.2 | 0.618878221 |
| MLKL | XM_001126647.1 | -0.61866213 |
| MYO1G | NM_033054.1 | 0.617504858 |
| FAM89A | XM_939093.1 | 0.617246513 |
| GART | NM_175085.1 | -0.61661938 |
| HOMER2 | NM_199331.2 | -0.616447403 |
| MNDA | NM_002432.1 | -0.616388269 |
| MGEA5 | NM_012215.2 | 0.615816839 |
| LRMP | NM_006152.2 | -0.615757849 |
| ASMTL | XM_942506.1 | 0.614244868 |
| MTSS1 | NM_014751.4 | 0.613367328 |
| PHF17 | NM_024900.3 | -0.613235638 |
| TUFT1 | NM_020127.1 | 0.612393134 |
| NFKBIE | NM_004556.2 | -0.61212368 |
| RHOC | NM_175744.4 | 0.611937489 |
| RCOR3 | NM_018254.2 | 0.610821781 |
| ASS1 | NM_000050.4 | -0.609848981 |
| TGFBR2 | NM_001024847.2 | 0.609692395 |
| BRI3BP | NM_080626.5 | -0.609568246 |
| PDE4D | NM_006203.3 | -0.609471243 |
| ANKDD1A | NM_182703.3 | 0.608932951 |
| LRCH4 | NM_002319.2 | 0.608665413 |
| INSIG1 | NM_198336.1 | -0.608446056 |
| CNFN | NM_032488.2 | 0.607397975 |
| BRI3BP | NM_080626.5 | -0.606384615 |
| ATP5G1 | NM_005175.2 | -0.606358576 |
| LOC728047 | XM_001126912.1 | -0.606015376 |
| ARSD | NM_001669.2 | 0.605826016 |
| MFSD6 | NM_017694.3 | 0.604045483 |
| RPL37 | NM_000997.3 | 0.604005073 |
| CDC25A | NM_001789.2 | -0.603948054 |
| SHANK3 | NM_001080420.1 | 0.603667952 |
| LOC727761 | XM_001126211.1 | -0.603332553 |
| MMP28 | NM_001032278.1 | 0.603221248 |
| GATA2 | NM_032638.3 | 0.60315307 |
| ELOVL6 | NM_024090.1 | -0.601851932 |
| CROP | NM_016424.3 | 0.601134848 |
| LOC791120 | NR_015357.1 | 0.601015752 |
| SLC38A5 | NM_033518.1 | -0.600923909 |
| BAZ2B | NM_013450.2 | 0.600864634 |
| LYAR | NM_017816.1 | -0.600640929 |
| PHACTR1 | NM_030948.1 | -0.599881581 |
| NMB | NM_021077.3 | -0.599807393 |
| PKD2 | NM_000297.2 | 0.599096317 |
| TOR3A | NM_022371.3 | -0.598939175 |
| RNU4-1 | NR_003925.1 | 0.598803729 |
| LOC100130892 | XM_001720172.1 | 0.598800657 |
| LRRC17 | NM_001031692.1 | -0.598235129 |
| LOC653344 | XM_933085.1 | 0.598008851 |
| ABCB1 | NM_000927.3 | 0.597637727 |
| TSPYL3 | XR_001421.1 | 0.597611318 |
| FAM89B | NM_001098784.1 | 0.597217488 |
|  | AK092074 | 0.597188448 |
| CEBPD | NM_005195.3 | -0.596688203 |
| TPRG1L | NM_182752.3 | 0.596467979 |
| NPC2 | NM_006432.3 | 0.59639002 |
| LGSN | NM_016571.1 | 0.596251234 |
| LOC644914 | XM_930111.2 | 0.59622382 |
| ERO1L | NM_014584.1 | -0.595578478 |
| CCDC24 | NM_152499.1 | 0.595513371 |
| PRIM2A | XM_001134299.1 | -0.594758774 |
| NCRNA00219 | NR_015370.1 | 0.594001793 |
| HCST | NM_001007469.1 | 0.593612238 |
| LPIN1 | NM_145693.1 | 0.593567028 |
| BHLHB2 | NM_003670.1 | 0.59334335 |
| ZWILCH | NM_017975.3 | -0.592021701 |
| RRS1 | NM_015169.3 | -0.591416436 |
| ZNF326 | NM_182976.1 | -0.591339579 |
| C5orf41 | NM_153607.1 | 0.590530783 |
| LOC644162 | XM_933956.1 | -0.590046944 |
| LSM12 | NM_152344.2 | -0.58963917 |
| GTF2H3 | NM_001516.3 | -0.588718397 |
| C14orf179 | NM_052873.1 | 0.587394635 |
| COL4A5 | NM_000495.3 | 0.587210266 |
| OSBPL2 | NM_144498.1 | 0.586381288 |
| CAST | NM_001042442.1 | 0.586223935 |
| B3GNTL1 | NM_001009905.1 | -0.586183713 |
| SLC38A10 | NM_138570.2 | -0.586011882 |

**Supplemental Table 7:** Significantly regulated genes by exposure to I-CBP112 in MOLM-13 cells after a 4 day exposure.

| **SYMBOL** | **ACCESSION** | **logFC** |
| --- | --- | --- |
| PRG2 | NM_002728.4 | -1.639232194 |
| MS4A3 | NM_006138.4 | -1.47321975 |
| IL8 | NM_000584.2 | -1.396195453 |
| CACNA2D3 | NM_018398.2 | -1.344117221 |
| MPO | NM_000250.1 | -1.327633118 |
| MS4A3 | NM_006138.4 | -1.297766477 |
| AIF1 | NM_032955.1 | -1.295411069 |
| CST7 | NM_003650.2 | -1.285628397 |
| RNASE3 | NM_002935.2 | -1.262303279 |
| CTSG | NM_001911.2 | -1.261036568 |
| CHI3L1 | NM_001276.2 | -1.217610872 |
| SERPINB10 | NM_005024.1 | -1.131353157 |
| CUX2 | NM_015267.2 | -1.118701772 |
| NFE2 | NM_006163.1 | -1.109079544 |
| LOC643332 | XR_016287.1 | -1.09412978 |
| FCGR1A | NM_000566.2 | -1.089914598 |
| RNASE2 | NM_002934.2 | -1.074627798 |
| C5orf20 | NM_130848.2 | -1.032472915 |
| EGR1 | NM_001964.2 | 1.011502202 |
| MS4A6A | NM_152851.1 | -1.002900864 |
| RGS18 | NM_130782.2 | -1.002391126 |
| S100A8 | NM_002964.3 | -1.001889746 |
| AIF1 | NM_001623.3 | -0.993513043 |
| S100A9 | NM_002965.2 | -0.972289041 |
| CFC1B | NM_001079530.1 | -0.957997689 |
| FGR | NM_001042729.1 | -0.955300402 |
| IL8 | NM_000584.2 | -0.949369292 |
| C19orf59 | NM_174918.2 | -0.946978511 |
| SPNS3 | NM_182538.3 | -0.944210941 |
| CCR2 | NM_000647.3 | -0.941974527 |
| LOC730517 | XM_001126166.1 | -0.938078431 |
| CORO2A | NM_003389.2 | -0.927753323 |
| SNORA12 | NR_002954.1 | 0.923431985 |
| PRSSL1 | NM_214710.2 | -0.90604267 |
| ARHGAP5 | NM_001173.2 | -0.885604357 |
| MS4A6A | NM_022349.2 | -0.866908432 |
| CD36 | NM_000072.2 | -0.853740183 |
| ORM1 | NM_000607.1 | -0.853486456 |
| LILRA2 | NM_006866.1 | -0.849052167 |
| RAB7B | NM_177403.3 | -0.848573119 |
| CCR2 | NM_000647.4 | -0.84591215 |
| CSF3R | NM_172313.1 | -0.84467196 |
| SERPINB2 | NM_002575.1 | -0.833119858 |
| PECAM1 | NM_000442.3 | -0.831750476 |
| SERPINB2 | NM_002575.1 | -0.830261994 |
| MLC1 | NM_015166.3 | -0.829717972 |
| FCGR1B | NM_001017986.1 | -0.824932499 |
| BPI | NM_001725.1 | -0.824047912 |
| CCL3L1 | NM_021006.4 | -0.82157174 |
| CD52 | NM_001803.2 | -0.813481394 |
| TNFSF13B | NM_006573.3 | -0.812783834 |
| THBS4 | NM_003248.3 | -0.810154773 |
| HLA-DRA | NM_019111.3 | -0.792283023 |
| SCARNA14 | NR_004388.1 | 0.778835793 |
| MNDA | NM_002432.1 | -0.778103696 |
| TIFAB | NM_001099221.1 | -0.769664747 |
| CCR2 | NM_000648.2 | -0.769503313 |
| TSPAN32 | NM_005705.4 | -0.768712406 |
| SERPINB8 | NM_002640.3 | -0.767695904 |
| FCGR1B | NM_001004340.1 | -0.753559572 |
| MS4A4A | NM_148975.1 | -0.752748701 |
| ASMTL | XM_942506.1 | 0.747425804 |
| SCARNA13 | NR_003002.1 | 0.746507053 |
| RN5S9 | NR_023371.1 | 0.742090357 |
| CXCR4 | NM_001008540.1 | -0.740410413 |
| FCER2 | NM_002002.3 | -0.724726185 |
| IFI6 | NM_022873.2 | 0.721309592 |
| ARHGEF10 | NM_014629.2 | -0.719462384 |
| LST1 | NM_007161.2 | -0.717548735 |
| CPVL | NM_019029.2 | 0.714203485 |
| TBC1D10C | NM_198517.2 | -0.711969457 |
| C13orf18 | NM_025113.1 | -0.707352932 |
| SNORD31 | NR_002560.1 | 0.705285853 |
| TMEM45A | NM_018004.1 | -0.704596247 |
| TRAPPC6A | NM_024108.1 | 0.703279731 |
| CSPG4 | NM_001897.4 | -0.701991311 |
| PRDM8 | NM_020226.3 | -0.699029818 |
| TGM5 | NM_004245.2 | -0.696730621 |
| CD36 | NM_001001548.1 | -0.694044215 |
| S1PR3 | NM_005226.2 | -0.685589366 |
| FCGR1C | NM_001128589.1 | -0.675616436 |
| CYFIP2 | NM_014376.2 | 0.671141626 |
| ATP6V1C2 | NM_144583.3 | -0.669259049 |
| TMEM14A | NM_014051.3 | 0.667309603 |
| MS4A6A | NM_152851.1 | -0.663502021 |
| PNOC | NM_006228.3 | -0.663144916 |
| SNORA57 | NR_004390.1 | 0.660109179 |
| GPR18 | NM_001098200.1 | -0.659289432 |
| LY96 | NM_015364.2 | 0.658397331 |
| RARRES3 | NM_004585.3 | 0.656919611 |
| IDI1 | NM_004508.2 | -0.656310383 |
|  | AY129027 | -0.6537868 |
| 37134 | NM_002688.4 | -0.650478319 |
| DHRS9 | NM_005771.3 | -0.645904872 |
| FTHL7 | NR_002202.2 | 0.645039294 |
|  | BX093329 | -0.638482928 |
| PTPN22 | NM_015967.3 | -0.638457746 |
| NANOS1 | NM_001009553.1 | -0.636033874 |
| SNX10 | NM_013322.2 | -0.635840359 |
| DYSF | NM_003494.2 | -0.635214108 |
| SCARNA8 | NR_003009.1 | 0.635192062 |
| SYTL1 | NM_032872.1 | -0.628275589 |
| PSAP | NM_001042465.1 | 0.626516856 |
| BASP1 | NM_006317.3 | -0.624755931 |
| LOC100134379 | XM_001720508.1 | -0.623016327 |
| TGM5 | NM_201631.2 | -0.621688195 |
| SERPINB8 | NM_198833.1 | -0.621530316 |
| CLCF1 | NM_013246.2 | -0.616351318 |
| TNFSF13B | NM_006573.3 | -0.615822026 |
| FCER1G | NM_004106.1 | -0.613515389 |
| RASGRP2 | NM_005825.2 | -0.612685259 |
| PLAC8 | NM_016619.1 | -0.612598797 |
| C13orf18 | NM_025113.1 | -0.611826776 |
| GPR84 | NM_020370.1 | -0.610399762 |
| LOC100134648 | XM_001724681.1 | 0.608430501 |
| SQRDL | NM_021199.2 | -0.606590774 |
| SLC22A4 | NM_003059.2 | -0.606522551 |
| IGLL1 | NM_020070.2 | -0.606142732 |
| MLKL | NM_152649.1 | -0.605608678 |
| WNT7B | NM_058238.1 | -0.605008071 |
| PSTPIP1 | NM_003978.2 | -0.604192959 |
| CCL3L3 | NM_001001437.3 | -0.595676743 |
| SHISA2 | NM_001007538.1 | -0.59528192 |
| METTL7B | NM_152637.1 | -0.594434951 |
| C3orf54 | NM_203370.1 | -0.591699864 |
| CAT | NM_001752.2 | -0.589083482 |
| INSIG1 | NM_198336.1 | -0.586611857 |
| CHST13 | NM_152889.1 | -0.586012155 |
| PLD3 | NM_001031696.1 | 0.585269752 |

**Supplemental Table 8:** Significantly regulated genes by exposure to I-CBP112 in SEM cells after a 4 day exposure.

| **SYMBOL** | **ACCESSION** | **logFC** |
| --- | --- | --- |
| LOC100008589 | NR_003287.1 | 2.444459698 |
| LOC100132394 | XM_001713809.1 | 2.318606627 |
| LOC100008589 | NR_003287.1 | 2.310711627 |
| LOC100134364 | XM_001713810.1 | 2.063037994 |
| LOC100133565 | XM_001724542.1 | 1.990136006 |
| CSF1R | NM_005211.2 | -1.985680186 |
| ADAMTSL2 | NM_014694.2 | 1.902519787 |
| LOC441763 | XM_930284.1 | 1.887924452 |
| SLC7A7 | NM_003982.2 | -1.842173109 |
| ID2 | NM_002166.4 | 1.730565243 |
| ID2 | NM_002166.4 | 1.637947926 |
| MGC33556 | NM_001004307.1 | -1.63673205 |
| SMAD7 | NM_005904.2 | 1.63331177 |
| VENTX | NM_014468.2 | -1.566521159 |
| HSPB7 | NM_014424.3 | -1.525703903 |
| SNORA12 | NR_002954.1 | 1.519383144 |
| CST7 | NM_003650.2 | -1.512389163 |
| CSPG4 | NM_001897.4 | -1.505235008 |
| NFE2 | NM_006163.1 | -1.471124194 |
| BMF | NM_033503.3 | 1.432866046 |
| PDGFRB | NM_002609.3 | -1.401235528 |
| PRSSL1 | NM_214710.2 | -1.331933325 |
| TMEM119 | NM_181724.1 | 1.305513996 |
| IL21R | NM_181078.1 | -1.299587543 |
| SCD | NM_005063.4 | -1.297479005 |
| ADA | NM_000022.2 | -1.28400768 |
| ANXA2 | NM_001002857.1 | -1.279952046 |
| CD72 | NM_001782.1 | -1.278144098 |
| NELL2 | NM_006159.1 | 1.27783016 |
| MIR1978 | NR_031742.1 | -1.270179683 |
| SMAD7 | NM_005904.2 | 1.260744223 |
| SCARNA13 | NR_003002.1 | 1.259635487 |
| CD52 | NM_001803.2 | -1.252455896 |
| ISG20 | NM_002201.4 | -1.247740807 |
| CYSLTR1 | NM_006639.2 | -1.245432152 |
| IFITM1 | NM_003641.3 | -1.232095307 |
| LCN6 | NM_198946.2 | -1.231159153 |
| SLC43A2 | NM_152346.1 | 1.228705384 |
| C17orf87 | NM_207103.1 | -1.226024261 |
| LRIG1 | NM_015541.2 | 1.207224498 |
| RGS2 | NM_002923.1 | -1.206134551 |
| BMF | NM_001003943.1 | 1.203282656 |
| ECM1 | NM_022664.1 | -1.192197833 |
| NQO1 | NM_000903.2 | 1.18281644 |
| FOS | NM_005252.2 | -1.17586733 |
| BAMBI | NM_012342.2 | 1.164360057 |
| MXD4 | NM_006454.2 | 1.160080602 |
| ACAD11 | NM_032169.4 | -1.14365653 |
| HLA-DRB4 | NM_021983.4 | -1.139998934 |
| EGR1 | NM_001964.2 | -1.137059502 |
| AK3L1 | NM_013410.2 | -1.120208128 |
| TLE4 | NM_007005.3 | 1.119221832 |
| LILRA2 | NM_006866.1 | -1.115064082 |
| CA2 | NM_000067.1 | -1.108890281 |
| PLEK | NM_002664.1 | -1.107076323 |
| CYP1A1 | NM_000499.2 | 1.107044348 |
| PGAM1 | NM_002629.2 | -1.097093724 |
| LRIG1 | NM_015541.2 | 1.09512074 |
| DAAM1 | NM_014992.1 | 1.093623976 |
| SREBF1 | NM_001005291.1 | -1.093074921 |
|  | AK026966 | -1.088680791 |
| GP9 | NM_000174.2 | -1.087262843 |
| NLGN4X | NM_020742.2 | -1.085104953 |
| REEP1 | NM_022912.1 | 1.066683035 |
| C17orf87 | NM_207103.2 | -1.065368685 |
| CCL5 | NM_002985.2 | -1.053819584 |
| NPW | NM_001099456.2 | -1.052619524 |
| SLC15A3 | NM_016582.1 | -1.051897951 |
| EVL | NM_016337.2 | -1.05121774 |
| NKG7 | NM_005601.3 | -1.047671857 |
| CTNNBL1 | NM_030877.3 | -1.033308027 |
| FAM69B | XM_001130258.1 | -1.033251279 |
| VWA5A | NM_014622.4 | 1.026270141 |
| SORBS2 | NM_003603.4 | 1.024122526 |
| HSH2D | NM_032855.2 | -1.007776123 |
| CHN2 | NM_004067.2 | 1.007047038 |
| LOC728188 | XM_001126103.2 | -1.004808883 |
| DDN | NM_015086.1 | -1.004787523 |
| SNORD13 | NR_003041.1 | 0.99059668 |
| APOBEC3G | NM_021822.1 | -0.988783363 |
| CACNA2D4 | NM_172364.4 | -0.981774933 |
| RFTN1 | NM_015150.1 | 0.981498214 |
| TLE4 | NM_007005.3 | 0.971960662 |
| ARSD | NM_001669.2 | 0.971143967 |
| ADARB1 | NM_001112.2 | 0.970185563 |
| HOPX | NM_139212.2 | 0.969015484 |
| LIMS2 | NM_017980.3 | -0.968395228 |
| RGL1 | NM_015149.3 | 0.965748132 |
| S100A13 | NM_001024211.1 | -0.96570075 |
| KAZALD1 | NM_030929.3 | -0.959295913 |
| SLC16A3 | NM_004207.2 | -0.958353187 |
| CARD9 | NM_052813.3 | -0.950676565 |
| RUNX2 | NM_001024630.2 | 0.949879104 |
| AK3L1 | NM_203464.1 | -0.948593208 |
| CTSO | NM_001334.2 | 0.944958519 |
| LOC387841 | XM_932678.1 | -0.941383181 |
| ANPEP | NM_001150.1 | 0.940240348 |
| SLA | NM_006748.1 | -0.933212782 |
| MCOLN2 | NM_153259.2 | -0.92582889 |
| SH3BP4 | NM_014521.2 | 0.922806371 |
| ACACA | NM_198839.1 | -0.915553918 |
| CLEC11A | NM_002975.2 | -0.912467558 |
| TBC1D10C | NM_198517.2 | -0.911651062 |
| ANGPT1 | NM_001146.3 | -0.908733882 |
| LOC643384 | XR_016363.2 | -0.906382262 |
| CCDC81 | NM_021827.3 | -0.905115396 |
| SPIRE1 | NM_020148.2 | 0.900306925 |
| CYTH1 | NM_017456.2 | 0.899583409 |
| SORBS2 | NM_003603.4 | 0.898761626 |
| CTNNA1 | NM_001903.2 | 0.898648128 |
| HNRPLL | NM_138394.2 | 0.898274719 |
| UNC93B1 | NM_030930.2 | -0.898201169 |
| CA2 | NM_000067.1 | -0.89534568 |
| SORD | XM_001132175.1 | -0.893251578 |
| ABLIM1 | NM_006720.3 | 0.890419807 |
| MYO10 | NM_012334.1 | 0.889352737 |
| SLC22A16 | NM_033125.2 | -0.886518474 |
| GPM6B | NM_001001995.1 | -0.885789177 |
| CRMP1 | NM_001014809.1 | 0.884390825 |
| EFNB2 | NM_004093.2 | 0.884331445 |
| IRAK2 | NM_001570.3 | -0.882557916 |
| FADS1 | NM_013402.3 | -0.881501449 |
| MPPE1 | NM_023075.4 | 0.880816171 |
| CD86 | NM_006889.3 | -0.880811133 |
| CCL5 | NM_002985.2 | -0.879251206 |
| C19orf59 | NM_174918.2 | -0.87427298 |
| ITPRIPL2 | NM_001034841.2 | -0.870008173 |
| TCF7 | NM_213648.1 | 0.866048729 |
| DHCR7 | NM_001360.1 | -0.865962211 |
| FAM65B | NM_015864.2 | -0.862169363 |
| TCF7 | NM_201632.1 | 0.861658995 |
| GPM6B | NM_001001995.1 | -0.861527561 |
| GNB4 | NM_021629.2 | -0.861055954 |
| PRICKLE1 | NM_153026.1 | -0.860069071 |
| KCNK3 | NM_002246.1 | 0.85800232 |
| GREM1 | NM_013372.5 | 0.854828333 |
| RPS6KA2 | NM_001006932.1 | 0.854536594 |
| RAPGEF2 | NM_014247.2 | 0.853714263 |
|  | AF131834 | 0.853567135 |
| RN7SK | NR_001445.1 | 0.850423205 |
| KLHL24 | NM_017644.3 | 0.850310568 |
| CD79B | NM_000626.1 | -0.850076641 |
| TPMT | NM_000367.2 | 0.847480228 |
| PKDCC | NM_138370.2 | -0.846514463 |
| TP53INP1 | NM_033285.2 | 0.84550346 |
| NRCAM | NM_005010.3 | 0.839689695 |
| SYTL2 | NM_206929.1 | 0.838653717 |
| S100A13 | NM_001024211.1 | -0.83706123 |
| CDKN1A | NM_000389.2 | -0.836309224 |
| PSCD1 | NM_017456.1 | 0.834015203 |
| S100A13 | NM_001024212.1 | -0.832242313 |
| PLAUR | NM_001005376.1 | -0.831926161 |
| SNORD12C | NR_002433.1 | -0.831206099 |
| FASN | NM_004104.4 | -0.830498859 |
| C1orf63 | NM_020317.3 | 0.826372736 |
| CORO1A | NM_007074.2 | -0.82591161 |
| LOC649143 | XM_944822.1 | -0.825680121 |
| HLA-DRB6 | NR_001298.1 | -0.823764332 |
| FSCN1 | NM_003088.2 | -0.823182387 |
| CCDC106 | NM_013301.2 | -0.822315318 |
| CEBPB | NM_005194.2 | 0.821110697 |
| GNB4 | NM_021629.3 | -0.819776351 |
| MFI2 | NM_033316.2 | 0.818571438 |
| CD93 | NM_012072.3 | -0.816159575 |
| EMILIN1 | NM_007046.1 | -0.813510621 |
| RASGRP3 | NM_170672.1 | 0.811159888 |
| LOC100132564 | XM_001713808.1 | 0.81094413 |
| CHI3L2 | NM_004000.2 | -0.807882681 |
| MYH9 | NM_002473.3 | 0.807819307 |
| CCND3 | NM_001760.2 | -0.807598849 |
| MACROD1 | NM_014067.2 | -0.80702333 |
| HSZFP36 | NM_001080493.1 | 0.806301402 |
| INSIG1 | NM_198336.1 | -0.805443491 |
| ACACA | NM_198836.1 | -0.803813867 |
| DSTN | NM_001011546.1 | 0.803560296 |
| TMEM158 | NM_015444.2 | 0.802197413 |
| NMT2 | NM_004808.1 | 0.799218365 |
| C17orf60 | NM_001085423.1 | -0.798368058 |
| PSD2 | NM_032289.2 | 0.796925959 |
| TNFSF13B | NM_006573.3 | -0.795673942 |
| INSIG1 | NM_198336.1 | -0.794985025 |
| RERE | NM_001042682.1 | 0.792276266 |
| KCNS3 | NM_002252.3 | 0.790742178 |
| ANXA2 | NM_001002858.1 | -0.789939269 |
| CKAP2 | NM_018204.2 | 0.788627091 |
| C17orf53 | NM_024032.2 | -0.785977439 |
| DHRS3 | NM_004753.4 | -0.785922885 |
| RAB8A | NM_005370.4 | -0.784060143 |
| CD79B | NM_001039933.1 | -0.781067398 |
| MLL5 | NM_018682.3 | 0.77969212 |
| IFITM2 | NM_006435.2 | -0.77933967 |
| TP53INP1 | NM_033285.2 | 0.775735014 |
| ORC6L | NM_014321.2 | -0.775294049 |
| DHCR7 | NM_001360.2 | -0.774882646 |
| NME1 | NM_000269.2 | -0.77414241 |
| ARHGEF3 | NM_019555.1 | 0.773258218 |
| CRIP2 | NM_001312.2 | 0.772792745 |
| PLAUR | NM_001005376.1 | -0.772070605 |
| BATF3 | NM_018664.1 | -0.771561379 |
| XYLT1 | NM_022166.3 | 0.768200247 |
| SLAMF1 | NM_003037.1 | 0.768193908 |
| CCNA1 | NM_003914.2 | -0.765017913 |
| LOC730415 | XM_001720835.1 | -0.764130725 |
| WDR19 | NM_025132.3 | 0.763971117 |
| BASP1 | NM_006317.3 | 0.762283331 |
| C7orf41 | NM_152793.2 | 0.762046698 |
| NLGN4X | NM_020742.2 | -0.760206794 |
| TSC22D1 | NM_006022.2 | 0.760161323 |
| ARHGAP30 | NM_181720.2 | -0.758455574 |
| ORC1L | NM_004153.2 | -0.753760954 |
| SNORA64 | NR_002326.1 | -0.751872187 |
| SRGN | NM_002727.2 | -0.751278386 |
| RALGAPA1 | NM_194301.2 | 0.749416514 |
| PACS1 | NM_018026.2 | 0.748461229 |
| ABCB6 | NM_005689.1 | 0.74727924 |
| RASD2 | NM_014310.3 | -0.746399733 |
| AKR1C3 | NM_003739.4 | 0.745651589 |
| P2RY11 | NM_002566.4 | -0.745464666 |
| DPAGT1 | NM_001382.2 | -0.744598043 |
| PELI2 | NM_021255.2 | 0.744449396 |
| TAGLN2 | NM_003564.1 | -0.7425604 |
| THOC4 | NM_005782.2 | -0.742357178 |
| ABHD4 | NM_022060.2 | -0.741618223 |
| GNA15 | NM_002068.1 | -0.741519715 |
| LOC653994 | XM_944429.1 | -0.740046121 |
| LONRF1 | NM_152271.3 | -0.739563349 |
| DNAJB2 | NM_006736.5 | 0.73891344 |
| LOC283340 | XM_932919.1 | -0.73719782 |
|  | AK091337 | 0.736178708 |
| MT1F | NM_005949.2 | 0.734524054 |
| SPI1 | NM_001080547.1 | -0.733382841 |
| PRPH | NM_006262.3 | 0.73233737 |
| PTPN7 | NM_080588.1 | -0.732276344 |
| GABARAPL1 | NM_031412.2 | 0.731455528 |
| TMEM184B | NM_012264.3 | 0.730626486 |
| AIF1 | NM_032955.1 | -0.727723146 |
| FOXO3 | NM_201559.2 | 0.727459876 |
| SPSB1 | NM_025106.2 | 0.727249395 |
|  | CR592039 | -0.726340753 |
| FAM81A | NM_152450.2 | -0.726234273 |
| MYO6 | NM_004999.3 | 0.725608325 |
| PER3 | NM_016831.1 | -0.725275464 |
| SLC27A3 | NM_024330.1 | -0.724281449 |
| ARHGEF7 | NM_003899.2 | 0.722758858 |
| PLAC8 | NM_016619.1 | -0.722430732 |
| DAAM1 | NM_014992.1 | 0.720986722 |
| ATP6V0B | NM_001039457.1 | -0.720863614 |
| MIR1228 | NR_031597.1 | -0.71991893 |
| N4BP2 | NM_018177.2 | 0.717874259 |
| WASPIP | NM_003387.3 | -0.716850411 |
| PLXDC2 | NM_032812.7 | -0.715873849 |
| CD9 | NM_001769.2 | -0.713654668 |
| FAM89B | NM_001098784.1 | 0.71349931 |
| SREBF1 | NM_004176.3 | -0.713134511 |
| FADS2 | NM_004265.2 | -0.712844496 |
| CCDC46 | NM_145036.2 | 0.712773073 |
| ICAM2 | NM_001099786.1 | -0.712426759 |
| PFN2 | NM_053024.2 | 0.711844445 |
| ANGPTL2 | NM_012098.2 | -0.709989181 |
| TNFSF13B | NM_006573.3 | -0.709680205 |
| CHES1 | NM_005197.2 | 0.709176554 |
| FTHL12 | NR_002205.1 | 0.708816999 |
| DTNA | NM_001392.3 | -0.708414524 |
| MCM7 | NM_005916.3 | -0.707842881 |
| FGFBP2 | NM_031950.2 | 0.707193716 |
| EP400 | NM_015409.3 | 0.705403807 |
| SPEN | NM_015001.2 | 0.704464632 |
| SLC44A1 | NM_080546.3 | 0.704169385 |
| PLEKHA1 | NM_001001974.1 | 0.703853535 |
| WIPI1 | NM_017983.4 | 0.703416801 |
| SNORA84 | NR_003704.2 | -0.702967194 |
| HLA-DRB6 | NR_001298.1 | -0.702334473 |
| IRF8 | NM_002163.2 | -0.701635165 |
| LPAR5 | NM_020400.4 | -0.700983852 |
| RERE | NM_012102.3 | 0.699629987 |
| MEGF6 | NM_001409.3 | -0.699164069 |
| NR4A2 | NM_006186.2 | 0.698587739 |
| DKFZp761P0423 | XM_291277.4 | -0.697975731 |
| APOBEC3G | NM_021822.1 | -0.696939404 |
| CYTSA | NM_015330.1 | 0.696089763 |
| ABR | NM_001092.3 | 0.695731865 |
| BIRC2 | NM_001166.3 | 0.694728775 |
| ANXA2P1 | NR_001562.1 | -0.694703887 |
| LOC606724 | NR_002454.2 | -0.694394455 |
| SNX7 | NM_152238.1 | 0.693747011 |
| S100A4 | NM_019554.2 | -0.693102104 |
| LOC100130458 | XM_001716901.1 | 0.691620303 |
| RN7SK | NR_001445.1 | 0.690301409 |
| IKZF1 | NM_006060.3 | -0.689947242 |
| ACSL1 | NM_001995.2 | 0.689773956 |
| PGAM1 | NM_002629.2 | -0.688517646 |
|  | BC070337 | -0.685450515 |
| KIAA1267 | NM_015443.2 | 0.685421104 |
| MRPL33 | NM_145330.2 | -0.685155012 |
| SLC44A1 | NM_080546.3 | 0.682603348 |
| HSPC111 | NM_016391.3 | -0.68231748 |
| NBPF20 | NM_001037675.1 | 0.681704163 |
| LOC200030 | NM_183372.3 | 0.681457263 |
| UGT3A2 | NM_174914.2 | -0.681293839 |
| PPM1M | NM_144641.1 | -0.681267452 |
| SNORA6 | NR_002325.1 | -0.680799166 |
| MYRIP | NM_015460.2 | 0.680797942 |
| UHRF1 | NM_013282.3 | -0.680666563 |
| SC4MOL | NM_001017369.1 | -0.679834498 |
| UPP1 | NM_003364.2 | 0.679441135 |
| C1orf63 | NM_207035.1 | 0.679172853 |
| PRAGMIN | NM_001080826.1 | -0.678817544 |
| KCNN4 | NM_002250.2 | -0.678465652 |
| FCRLA | NM_032738.3 | -0.678355953 |
| LY86 | NM_004271.3 | -0.678141134 |
| BCOR | NM_017745.4 | 0.677505994 |
| NOP16 | NM_016391.4 | -0.676470351 |
| GRAMD4 | NM_015124.2 | -0.675770436 |
| TSC22D1 | NM_006022.2 | 0.675406222 |
| SLC7A3 | NM_032803.4 | 0.674809903 |
| NRCAM | NM_005010.3 | 0.674104604 |
| SC4MOL | NM_006745.3 | -0.672643926 |
| SLITRK4 | NM_173078.2 | -0.672543813 |
| GREM1 | NM_013372.5 | 0.672368369 |
| LOC732007 | XR_015684.1 | -0.672357074 |
| IL1RN | NM_173843.1 | -0.672179882 |
| CRLF2 | XM_001133960.1 | -0.671181222 |
| KCNMB1 | NM_004137.2 | -0.66862687 |
| C11orf67 | NM_024684.2 | 0.668543353 |
| RPL8 | NM_033301.1 | -0.668538471 |
| FBXO32 | NM_148177.1 | 0.666753111 |
| CSRP2 | NM_001321.1 | 0.665099304 |
| RPL13 | NM_033251.1 | -0.664996087 |
| BTG2 | NM_006763.2 | 0.663564702 |
| NPAL3 | NM_020448.3 | 0.663548569 |
| ZNF232 | NM_014519.2 | -0.662934829 |
| SNORD36C | NR_000016.1 | -0.661906138 |
| MRPL33 | NM_004891.2 | -0.661887392 |
| RYBP | NM_012234.4 | 0.661408682 |
| CD33 | NM_001772.3 | -0.660964461 |
| CD70 | NM_001252.3 | -0.660833443 |
| THOC4 | XM_001134346.1 | -0.660795321 |
| CTNNA1 | NM_001903.2 | 0.660382476 |
| ZNF443 | NM_005815.2 | 0.660298437 |
| AFMID | NM_001010982.2 | -0.659539886 |
| ATP2A3 | NM_174955.1 | 0.659244172 |
| MPRIP | NM_015134.2 | 0.658742528 |
| OPTN | NM_001008213.1 | 0.65841584 |
| WASF3 | NM_006646.4 | 0.657175649 |
| PPP2R5C | NM_002719.2 | -0.65687046 |
| NMT2 | NM_004808.2 | 0.656717521 |
| ADORA2B | NM_000676.2 | -0.65594592 |
| SNORD31 | NR_002560.1 | -0.655228044 |
| ZNF627 | NM_145295.2 | 0.654253431 |
| BCOR | NM_020926.2 | 0.653166196 |
| TRO | NM_001039705.1 | 0.652965423 |
| SLC24A6 | NM_024959.2 | 0.652627683 |
| LOC644063 | XR_016547.1 | -0.652535845 |
| FAM113B | NM_138371.1 | -0.649967636 |
| ANKRD41 | NM_152363.2 | -0.649857101 |
| RALGPS1 | NM_014636.1 | 0.649695753 |
| PNKD | NM_022572.2 | -0.649414801 |
| ARHGAP30 | NM_001025598.1 | -0.649255942 |
| GARNL4 | NM_015085.3 | -0.64848921 |
| PSMC4 | NM_006503.2 | -0.6479817 |
| KLRC3 | NM_002261.2 | 0.64701401 |
| LOC284422 | XM_209196.5 | -0.646875501 |
| ALDH3B1 | NM_000694.2 | -0.646530138 |
| LOC646786 | XM_929738.1 | 0.646084199 |
| MLKL | NM_152649.1 | -0.645118512 |
| NPHP3 | NM_153240.3 | 0.645039308 |
| CXXC5 | NM_016463.7 | 0.644395259 |
| RFXANK | NM_134440.1 | -0.642224833 |
| WDR74 | XM_001125771.1 | -0.642045054 |
| SLA | NM_001045557.1 | -0.641383126 |
| FAIM3 | NM_005449.3 | -0.641012722 |
| CHN2 | NM_004067.2 | 0.640984355 |
| UNC93B1 | NM_030930.2 | -0.640806438 |
| CIDEB | NM_014430.2 | -0.640771253 |
| LIN28B | NM_001004317.2 | -0.640636269 |
| ZNF84 | NM_003428.4 | 0.639943429 |
| BDH1 | NM_203314.2 | -0.639367962 |
| SLC17A9 | NM_022082.3 | -0.638944344 |
| BHLHB2 | NM_003670.1 | 0.637554076 |
| SFXN4 | NM_213650.1 | -0.636624224 |
| LOC91461 | NM_138370.1 | -0.636305323 |
| ADD1 | NM_001119.3 | 0.636170683 |
| CD99 | NM_002414.3 | 0.635133593 |
| WDR12 | NM_018256.2 | -0.634143054 |
| SPTAN1 | NM_003127.1 | 0.633805715 |
| RN5S9 | NR_023371.1 | 0.63237276 |
| TESK2 | NM_007170.2 | 0.6322145 |
| SNORA45 | NR_002977.1 | -0.631567028 |
| GATM | NM_001482.2 | -0.631159587 |
| DHCR24 | NM_014762.3 | -0.630778043 |
| PKD2 | NM_000297.2 | 0.630322351 |
| LOC100133163 | XM_001726385.1 | 0.629845066 |
| ACBD7 | XM_928013.1 | 0.62967076 |
| MAZ | NM_001042539.1 | 0.629612286 |
| TEAD4 | NM_201443.1 | -0.628645045 |
| RNF125 | NM_017831.3 | -0.628633249 |
| LOC643446 | XM_001131589.1 | -0.6284174 |
| XAF1 | NM_199139.1 | -0.627507825 |
| CRBN | NM_016302.2 | 0.627302686 |
| TRO | NM_001039705.1 | 0.627277535 |
| STMN3 | NM_015894.2 | 0.627136233 |
| RTN4R | NM_023004.5 | -0.625796205 |
| ZSWIM6 | XM_035299.8 | 0.624776878 |
| MAPK13 | NM_002754.3 | -0.624688488 |
| LOC642755 | XM_926382.2 | 0.622726918 |
| HMGCS1 | NM_002130.6 | -0.622305774 |
| 38595 | NM_006640.3 | 0.621840242 |
| RASSF1 | NM_170712.1 | -0.620625957 |
| ITGB2 | NM_000211.1 | -0.620385442 |
| SLC26A9 | NM_052934.2 | -0.619343218 |
| ULK1 | NM_003565.1 | 0.618800676 |
| LACTB | NM_032857.2 | 0.618271457 |
| S100A4 | NM_019554.2 | -0.61813018 |
| C6orf185 | XM_168055.6 | -0.618095485 |
| ZNF296 | NM_145288.1 | -0.617960852 |
| ALDOC | NM_005165.2 | -0.617390503 |
| ACVR1 | NM_001105.2 | 0.61715559 |
| ULK1 | NM_003565.1 | 0.616869259 |
| PLEKHA1 | NM_021622.3 | 0.61686098 |
| SRGN | NM_002727.2 | -0.616781535 |
| FLJ20021 | XM_028217.4 | 0.616513635 |
| PHLDA1 | NM_007350.3 | 0.616480507 |
| TMEM91 | NM_001042595.1 | 0.616312108 |
| UBL3 | NM_007106.2 | 0.615953795 |
| TRPM2 | NM_001001188.3 | -0.615708759 |
| LOC401152 | NM_001001701.1 | 0.615024343 |
| LOC651697 | XR_039237.1 | -0.61461379 |
| ARHGAP9 | NM_001080156.1 | -0.614417583 |
| GCLC | NM_001498.2 | 0.61415459 |
|  | AW967735 | -0.613868384 |
| PDCD6IP | NM_013374.3 | 0.613377252 |
| CST3 | NM_000099.2 | 0.61197513 |
| AK3L1 | NM_203464.1 | -0.611936431 |
| APOBEC3B | NM_004900.3 | -0.611789771 |
| TLR10 | NM_001017388.1 | -0.610641386 |
| CAST | NM_001042442.1 | 0.609957429 |
| ZNF823 | NM_001080493.2 | 0.608611175 |
| COMTD1 | NM_144589.2 | -0.608323553 |
| FYN | NM_153047.1 | 0.608228747 |
| LOC401233 | NM_001013680.1 | 0.607740554 |
| YPEL5 | NM_016061.1 | 0.606964344 |
| TBC1D8B | NM_198881.1 | -0.606928041 |
| ZNF232 | NM_014519.2 | -0.606378267 |
| MOAP1 | NM_022151.4 | 0.605427504 |
| ABLIM1 | NM_001003407.1 | 0.605036661 |
| STAMBPL1 | NM_020799.2 | -0.604874337 |
| CXXC5 | NM_016463.5 | 0.604256568 |
| CD79A | NM_001783.3 | -0.603661787 |
| CECR1 | NM_177405.1 | 0.603017303 |
|  | BC035116 | 0.602337079 |
| TSEN34 | NM_001077446.1 | 0.601990962 |
| FNBP1 | NM_015033.2 | 0.601625635 |
| BAZ2B | NM_013450.2 | 0.600526755 |
| ITPKA | NM_002220.1 | -0.598355197 |
| FTHL2 | NR_002200.1 | 0.598093312 |
| TMEM135 | NM_022918.2 | -0.596435772 |
| RASSF1 | NM_007182.4 | -0.595928474 |
| GBF1 | NM_004193.1 | 0.595736805 |
| DKFZp451A211 | NM_001003399.1 | -0.595537191 |
| LOC653994 | XM_944439.2 | -0.594321004 |
| SMG7 | NM_173156.1 | 0.594065009 |
| PFKFB3 | NM_004566.2 | 0.59329284 |
| RPL34 | NM_033625.2 | -0.593059328 |
| INPP5D | NM_005541.3 | -0.592531692 |
| SULT1A1 | NM_177536.1 | -0.592004332 |
| DNAJC12 | NM_021800.2 | -0.591627104 |
| AKAP13 | NM_007200.3 | 0.591541714 |
| SLC13A5 | NM_177550.2 | -0.591283368 |
| CTSK | NM_000396.2 | 0.591155904 |
| DACT3 | NM_145056.1 | 0.591148876 |
| DNAJC12 | NM_201262.1 | -0.591050343 |
| SPG11 | NM_025137.3 | 0.590916844 |
| KIF7 | NM_198525.1 | 0.589781842 |
| DUSP18 | NM_152511.3 | 0.589514735 |
| FAM101B | NM_182705.2 | -0.589219517 |
| GLIPR2 | NM_022343.2 | 0.589119895 |
| DAZAP1 | NM_170711.1 | -0.588276915 |
| NLRP3 | NM_004895.3 | -0.587847422 |
| NP | NM_000270.1 | -0.587826014 |
| ATF4 | NM_001675.2 | -0.587796083 |
| LDLR | NM_000527.2 | -0.586050414 |
| BTBD11 | NM_152322.2 | 0.585595313 |
